# Supplementary material
Source: publisher figshare collection journal article supplement (https://asha.figshare.com/articles/dataset/_/7616555)
Supplement: Supplementary file 1 [file 1]

**Supplemental Material S1.** Percentage of correct and incorrect trials in each condition.

| Amusics                   | High variation |         | Low variation |         |
|---------------------------|----------------|---------|---------------|---------|
|                           | Incorrect      | Correct | Incorrect     | Correct |
| Identification (talker)   | 59%            | 41%     | 59%           | 41%     |
| Discrimination (talker)   | 27%            | 73%     | 20%           | 80%     |
| Identification (syllable) | 56%            | 44%     | 56%           | 44%     |
| Discrimination (syllable) | 46%            | 54%     | 24%           | 76%     |
| Controls                  | High variation |         | Low variation |         |
|                           | Incorrect      | Correct | Incorrect     | Correct |
| Identification (talker)   | 40%            | 60%     | 37%           | 63%     |
| Discrimination (talker)   | 15%            | 85%     | 6%            | 94%     |
| Identification (syllable) | 40%            | 60%     | 35%           | 65%     |
| Discrimination (syllable) | 29%            | 71%     | 7%            | 93%     |
